# Supplementary material for: The Physical, Sensory, and Microbial Qualities of Broth Gels Enclosing Food Cubes and Their Changes during Cold Storage
Source: MDPI journal article supplement (doi:10.3390/pr11082327), 2023-08-02
Supplement: s1 [file s1]

Table S3. QDA results of broth gels and inner food cubes (shrimp)

| Sensory evaluation of broth gel        |                    |                  |                             |                         |                          |                          |                           |                         |                          |                         |                         |
|----------------------------------------|--------------------|------------------|-----------------------------|-------------------------|--------------------------|--------------------------|---------------------------|-------------------------|--------------------------|-------------------------|-------------------------|
| Inner food                             | Gelling agent      | Storage time (d) | QDA traits                  |                         |                          |                          |                           |                         |                          |                         |                         |
|                                        |                    |                  | Transparent                 | Yellowness              | Salty                    | Fishy                    | Aftertaste                | Hardness                | Moisture                 | Chewiness               | Meltness                |
| Shrimp                                 | G1C1 <sup>1)</sup> | 0                | 6.60±2.19 <sup>bcd 2)</sup> | 4.91±1.75 <sup>c</sup>  | 8.18±2.21 <sup>ab</sup>  | 7.59±1.85 <sup>ab</sup>  | 7.34±2.18 <sup>abc</sup>  | 9.36±1.55 <sup>a</sup>  | 6.62±1.96 <sup>bc</sup>  | 5.55±0.80 <sup>cd</sup> | 6.09±2.43 <sup>bc</sup> |
|                                        |                    | 3                | 5.90±2.74 <sup>d</sup>      | 5.46±1.68 <sup>c</sup>  | 4.25±2.18 <sup>c</sup>   | 3.51±1.49 <sup>d</sup>   | 4.53±2.15 <sup>d</sup>    | 9.72±2.49 <sup>a</sup>  | 5.36±2.83 <sup>c</sup>   | 4.10±1.85 <sup>d</sup>  | 4.89±2.36 <sup>c</sup>  |
|                                        |                    | 7                | 5.57±1.84 <sup>d</sup>      | 4.92±1.58 <sup>c</sup>  | 6.65±1.69 <sup>b</sup>   | 6.33±2.02 <sup>bc</sup>  | 6.81±2.34 <sup>abcd</sup> | 7.40±1.83 <sup>bc</sup> | 6.66±2.53 <sup>bc</sup>  | 5.94±1.89 <sup>c</sup>  | 6.08±2.11 <sup>bc</sup> |
|                                        | G1.5C0.5           | 0                | 8.66±1.57 <sup>ab</sup>     | 6.00±2.06 <sup>bc</sup> | 9.57±1.32 <sup>a</sup>   | 8.93±1.88 <sup>a</sup>   | 8.76±1.82 <sup>a</sup>    | 6.87±1.37 <sup>c</sup>  | 7.70±1.75 <sup>abc</sup> | 8.49±1.05 <sup>ab</sup> | 7.47±2.36 <sup>b</sup>  |
|                                        |                    | 3                | 6.24±2.60 <sup>cd</sup>     | 7.91±1.71 <sup>ab</sup> | 4.40±2.10 <sup>c</sup>   | 4.25±1.64 <sup>d</sup>   | 5.43±1.96 <sup>cd</sup>   | 9.15±1.82 <sup>ab</sup> | 6.42±2.05 <sup>bc</sup>  | 5.78±1.91 <sup>c</sup>  | 6.74±2.36 <sup>bc</sup> |
|                                        |                    | 7                | 7.94±2.07 <sup>abc</sup>    | 5.96±1.72 <sup>bc</sup> | 6.93±2.34 <sup>b</sup>   | 7.14±1.75 <sup>ab</sup>  | 7.55±2.49 <sup>abc</sup>  | 6.80±1.37 <sup>c</sup>  | 7.62±2.41 <sup>abc</sup> | 8.06±2.05 <sup>b</sup>  | 7.11±2.15 <sup>bc</sup> |
|                                        | G2C0               | 0                | 9.92±2.00 <sup>a</sup>      | 7.64±2.33 <sup>ab</sup> | 10.10±1.50 <sup>a</sup>  | 9.14±2.32 <sup>a</sup>   | 9.02±1.86 <sup>a</sup>    | 5.40±1.26 <sup>c</sup>  | 9.27±2.62 <sup>a</sup>   | 10.07±1.37 <sup>a</sup> | 9.62±2.19 <sup>a</sup>  |
|                                        |                    | 3                | 9.27±2.51 <sup>a</sup>      | 8.79±2.55 <sup>a</sup>  | 4.65±2.69 <sup>c</sup>   | 4.65±2.37 <sup>cd</sup>  | 5.90±3.06 <sup>bcd</sup>  | 9.32±3.31 <sup>a</sup>  | 7.43±2.13 <sup>abc</sup> | 7.97±2.22 <sup>b</sup>  | 7.32±1.98 <sup>b</sup>  |
|                                        |                    | 7                | 9.63±2.41 <sup>a</sup>      | 8.06±2.65 <sup>a</sup>  | 7.13±3.10 <sup>b</sup>   | 8.04±3.08 <sup>ab</sup>  | 8.15±3.27 <sup>ab</sup>   | 6.41±2.30 <sup>c</sup>  | 8.10±2.26 <sup>ab</sup>  | 8.61±2.34 <sup>ab</sup> | 7.20±2.91 <sup>bc</sup> |
| Sensory evaluation of inner food cubes |                    |                  |                             |                         |                          |                          |                           |                         |                          |                         |                         |
| Inner food                             | Gelling agent      | Storage time (d) | QDA traits                  |                         |                          |                          |                           |                         |                          |                         |                         |
|                                        |                    |                  | Whiteness                   | Odor                    | Salty                    | Fishy                    | Flavor                    | Aftertaste              | Hardness                 | Moisture                | Chewiness               |
| Shrimp                                 | G1C1               | 0                | 7.46±1.81 <sup>ns</sup>     | 8.69±2.49 <sup>ab</sup> | 6.71±2.01 <sup>abc</sup> | 6.32±2.62 <sup>abc</sup> | 8.13±2.66 <sup>ns</sup>   | 5.73±2.36 <sup>ns</sup> | 9.47±2.68 <sup>a</sup>   | 7.28±1.55 <sup>ab</sup> | 6.20±2.14 <sup>ns</sup> |
|                                        |                    | 3                | 6.84±1.96                   | 6.96±1.96 <sup>b</sup>  | 4.88±2.63 <sup>c</sup>   | 3.51±2.47 <sup>d</sup>   | 6.30±2.51                 | 6.05±2.14               | 7.64±2.09 <sup>ab</sup>  | 6.11±3.05 <sup>b</sup>  | 6.83±2.98               |
|                                        |                    | 7                | 6.99±1.40                   | 7.70±2.57 <sup>ab</sup> | 6.20±1.77 <sup>abc</sup> | 6.27±2.85 <sup>abc</sup> | 6.75±2.36                 | 6.14±1.80               | 8.06±2.27 <sup>ab</sup>  | 6.83±1.77 <sup>ab</sup> | 6.47±2.56               |
|                                        | G1.5C0.5           | 0                | 7.67±2.25                   | 8.57±0.65 <sup>ab</sup> | 7.31±2.10 <sup>ab</sup>  | 6.93±2.00 <sup>abc</sup> | 8.48±1.16                 | 6.81±1.82               | 8.73±1.16 <sup>ab</sup>  | 7.64±2.03 <sup>ab</sup> | 6.72±1.85               |
|                                        |                    | 3                | 7.22±1.55                   | 7.01±1.68 <sup>b</sup>  | 5.54±2.70 <sup>bc</sup>  | 4.26±2.65 <sup>cd</sup>  | 6.51±2.26                 | 6.44±2.49               | 7.23±2.66 <sup>ab</sup>  | 6.57±2.72 <sup>ab</sup> | 6.59±2.19               |
|                                        |                    | 7                | 6.48±1.97                   | 8.46±2.54 <sup>ab</sup> | 6.00±1.71 <sup>abc</sup> | 7.22±3.08 <sup>ab</sup>  | 7.29±2.14                 | 6.47±2.06               | 7.86±2.61 <sup>ab</sup>  | 7.44±1.84 <sup>ab</sup> | 6.50±2.44               |
|                                        | G2C0               | 0                | 7.97±2.30                   | 8.36±1.34 <sup>ab</sup> | 8.31±2.39 <sup>a</sup>   | 7.49±2.29 <sup>ab</sup>  | 8.46±1.26                 | 7.76±2.44               | 9.47±1.36 <sup>a</sup>   | 8.85±2.22 <sup>a</sup>  | 6.80±1.95               |
|                                        |                    | 3                | 7.08±1.88                   | 7.40±2.73 <sup>ab</sup> | 6.32±3.07 <sup>abc</sup> | 5.07±3.26 <sup>bcd</sup> | 6.56±3.25                 | 6.89±3.33               | 6.78±3.27 <sup>b</sup>   | 7.97±2.71 <sup>ab</sup> | 6.59±2.19               |
|                                        |                    | 7                | 8.10±2.28                   | 9.50±2.56 <sup>a</sup>  | 6.54±1.84 <sup>abc</sup> | 8.27±3.28 <sup>a</sup>   | 7.74±3.08                 | 8.01±2.77               | 8.03±2.88 <sup>ab</sup>  | 7.59±1.94 <sup>ab</sup> | 7.28±2.12               |

All data are represented as mean ± standard deviation (SD).

<sup>1)</sup> G1C1, gelatin 1 % and carrageenan 1 % mixture; G1.5C0.5, gelatin 1.5 % and carrageenan 0.5 % mixture; G2C0, gelatin 2 % (w/w %)

<sup>2)</sup> Different superscripts within column (a-g) or within row (X-Z) indicates significant differences at p < 0.05. ns, not significant within column.
