# Supplementary material for: The Physical, Sensory, and Microbial Qualities of Broth Gels Enclosing Food Cubes and Their Changes during Cold Storage
Source: MDPI journal article supplement (doi:10.3390/pr11082327), 2023-08-02
Supplement: s1 [file s1]

Table S1. Redness of broth gels and food cubes

| Redness (a*) of outer broth gel  |                    |                             |                          |                            |                           |
|----------------------------------|--------------------|-----------------------------|--------------------------|----------------------------|---------------------------|
| Inner food                       | Gelling agent      | Storage time (days)         |                          |                            |                           |
|                                  |                    | 0                           | 3                        | 7                          | 14                        |
| S <sup>1)</sup>                  | G1C1 <sup>2)</sup> | -4.40±0.12 <sup>eY 3)</sup> | -4.13±0.20 <sup>eY</sup> | -5.97±0.74 <sup>fZ</sup>   | -1.10±0.06 <sup>aX</sup>  |
|                                  | G1.5C0.5           | -3.83±0.27 <sup>eX</sup>    | -3.01±0.27 <sup>dX</sup> | -4.96±0.45 <sup>defX</sup> | -29.29±2.69 <sup>bY</sup> |
|                                  | G2C0               | -1.27±0.65 <sup>bX</sup>    | 0.24±0.19 <sup>aX</sup>  | -3.71±0.23 <sup>abcY</sup> | -34.53±2.11 <sup>cZ</sup> |
| C                                | G1C1               | -3.01±0.16 <sup>dY</sup>    | -3.45±0.48 <sup>dY</sup> | -5.51±0.53 <sup>efZ</sup>  | -1.36±0.22 <sup>aX</sup>  |
|                                  | G1.5C0.5           | -3.90±0.06 <sup>eX</sup>    | -3.09±0.53 <sup>dX</sup> | -3.31±0.67 <sup>abX</sup>  | -27.54±1.89 <sup>bY</sup> |
|                                  | G2C0               | -1.91±0.11 <sup>cX</sup>    | -0.71±0.14 <sup>bX</sup> | 2.36±1.51 <sup>gY</sup>    | -30.40±2.63 <sup>bZ</sup> |
| P                                | G1C1               | -3.15±0.11 <sup>dY</sup>    | -2.78±0.19 <sup>dY</sup> | -3.20±0.36 <sup>aY</sup>   | -1.59±0.31 <sup>aX</sup>  |
|                                  | G1.5C0.5           | -3.94±0.12 <sup>eY</sup>    | -1.92±0.40 <sup>cX</sup> | -4.26±0.58 <sup>bcdY</sup> | -28.47±1.00 <sup>bZ</sup> |
|                                  | G2C0               | -0.38±0.55 <sup>aX</sup>    | -1.88±0.56 <sup>cX</sup> | -4.63±0.31 <sup>cdeY</sup> | -35.60±2.09 <sup>cZ</sup> |
| Redness (a*) of inner food cubes |                    |                             |                          |                            |                           |
| Inner food                       | Gelling agent      | Storage time (days)         |                          |                            |                           |
|                                  |                    | 0                           | 3                        | 7                          | 14                        |
| S                                | G1C1               | -12.01±1.66 <sup>cdY</sup>  | -0.83±0.45 <sup>aX</sup> | -0.48±0.29 <sup>aX</sup>   | -1.09±0.86 <sup>aX</sup>  |
|                                  | G1.5C0.5           | -12.43±0.85 <sup>deY</sup>  | -1.21±0.34 <sup>aX</sup> | -1.96±0.70 <sup>aX</sup>   | -1.44±1.23 <sup>aX</sup>  |
|                                  | G2C0               | -12.36±0.53 <sup>deZ</sup>  | -3.63±1.70 <sup>bX</sup> | -6.62±1.65 <sup>cdY</sup>  | -1.75±1.06 <sup>aX</sup>  |
| C                                | G1C1               | -8.39±1.03 <sup>aZ</sup>    | -3.06±0.17 <sup>bX</sup> | -5.47±1.10 <sup>bcY</sup>  | -4.21±0.59 <sup>bXY</sup> |
|                                  | G1.5C0.5           | -8.91±1.14 <sup>abY</sup>   | -4.41±1.30 <sup>bX</sup> | -4.19±0.99 <sup>bX</sup>   | -4.88±0.15 <sup>bX</sup>  |
|                                  | G2C0               | -10.50±1.16 <sup>bcY</sup>  | -4.06±0.38 <sup>bX</sup> | -4.38±0.25 <sup>bX</sup>   | -4.44±0.49 <sup>bX</sup>  |
| P                                | G1C1               | -14.68±0.35 <sup>fY</sup>   | -6.93±0.89 <sup>cX</sup> | -7.60±1.14 <sup>deX</sup>  | -6.86±0.09 <sup>cX</sup>  |
|                                  | G1.5C0.5           | -13.89±0.56 <sup>efY</sup>  | -7.96±0.60 <sup>cX</sup> | -7.60±0.20 <sup>deX</sup>  | -7.63±0.25 <sup>cX</sup>  |
|                                  | G2C0               | -13.62±0.76 <sup>defZ</sup> | -7.63±0.35 <sup>cX</sup> | -8.86±0.80 <sup>eY</sup>   | -8.03±0.32 <sup>cXY</sup> |

All data are represented as mean ± standard deviation (SD).

<sup>1)</sup> S, shrimp; C, chicken; P, potato

<sup>2)</sup> G1C1, gelatin 1 % and carrageenan 1 % mixture; G1.5C0.5, gelatin 1.5 % and carrageenan 0.5 % mixture; G2C0, gelatin 2 % (w/w %)

<sup>3)</sup> Different superscripts within column (a-g) or within row (X-Z) indicates significant differences at p < 0.05.
