# Supplementary material for: The Physical, Sensory, and Microbial Qualities of Broth Gels Enclosing Food Cubes and Their Changes during Cold Storage
Source: MDPI journal article supplement (doi:10.3390/pr11082327), 2023-08-02
Supplement: s1 [file s1]

Table S4. QDA results of broth gels and inner food cubes (chicken)

| Sensory evaluation of broth gel        |                    |                  |                           |                            |                         |                          |                         |                         |                         |                          |                          |
|----------------------------------------|--------------------|------------------|---------------------------|----------------------------|-------------------------|--------------------------|-------------------------|-------------------------|-------------------------|--------------------------|--------------------------|
| Inner food                             | Gelling agent      | Storage time (d) | QDA traits                |                            |                         |                          |                         |                         |                         |                          |                          |
|                                        |                    |                  | Transparent               | Yellowness                 | Salty                   | Fishy                    | Aftertaste              | Hardness                | Moisture                | Chewiness                | Meltness                 |
| Chicken                                | G1C1 <sup>1)</sup> | 0                | 6.12±2.48 <sup>b 2)</sup> | 4.58±1.83 <sup>f</sup>     | 8.00±2.34 <sup>a</sup>  | 7.55±1.94 <sup>ab</sup>  | 7.38±2.14 <sup>ab</sup> | 9.24±1.53 <sup>ab</sup> | 6.50±2.06 <sup>ab</sup> | 5.48±0.81 <sup>def</sup> | 6.05±2.43 <sup>bcd</sup> |
|                                        |                    | 3                | 5.99±2.66 <sup>b</sup>    | 5.51±1.62 <sup>def</sup>   | 4.17±2.12 <sup>b</sup>  | 3.57±1.49 <sup>d</sup>   | 4.46±2.08 <sup>c</sup>  | 9.78±2.40 <sup>a</sup>  | 5.43±2.78 <sup>b</sup>  | 4.01±1.91 <sup>f</sup>   | 4.85±2.38 <sup>d</sup>   |
|                                        |                    | 7                | 5.09±3.18 <sup>b</sup>    | 5.07±1.69 <sup>ef</sup>    | 4.55±2.05 <sup>b</sup>  | 4.01±1.89 <sup>d</sup>   | 4.38±1.91 <sup>c</sup>  | 8.84±2.03 <sup>ab</sup> | 6.18±2.92 <sup>b</sup>  | 4.71±1.69 <sup>ef</sup>  | 5.49±1.93 <sup>cd</sup>  |
|                                        | G1.5C0.5           | 0                | 7.62±1.70 <sup>ab</sup>   | 6.47±1.80 <sup>cdef</sup>  | 5.75±1.92 <sup>b</sup>  | 6.30±2.13 <sup>bc</sup>  | 6.77±1.18 <sup>ab</sup> | 7.43±1.03 <sup>bc</sup> | 8.00±2.17 <sup>ab</sup> | 7.64±1.65 <sup>bc</sup>  | 8.00±1.52 <sup>ab</sup>  |
|                                        |                    | 3                | 6.30±2.49 <sup>b</sup>    | 7.98±1.79 <sup>abc</sup>   | 4.46±2.02 <sup>b</sup>  | 4.32±1.53 <sup>cd</sup>  | 5.49±1.93 <sup>bc</sup> | 9.23±1.84 <sup>ab</sup> | 6.51±1.95 <sup>ab</sup> | 5.85±1.89 <sup>de</sup>  | 6.68±2.29 <sup>bcd</sup> |
|                                        |                    | 7                | 6.75±2.43 <sup>ab</sup>   | 6.65±1.93 <sup>bcdde</sup> | 4.61±2.02 <sup>b</sup>  | 4.88±2.46 <sup>cd</sup>  | 5.55±2.44 <sup>bc</sup> | 7.70±1.62 <sup>bc</sup> | 6.95±2.34 <sup>ab</sup> | 6.69±1.64 <sup>cd</sup>  | 6.27±1.60 <sup>bcd</sup> |
|                                        | G2C0               | 0                | 9.21±2.92 <sup>a</sup>    | 7.16±2.51 <sup>abcd</sup>  | 9.42±2.53 <sup>a</sup>  | 9.00±2.46 <sup>a</sup>   | 8.52±2.26 <sup>a</sup>  | 5.42±1.27 <sup>d</sup>  | 9.02±2.80 <sup>a</sup>  | 9.83±1.64 <sup>a</sup>   | 9.03±2.73 <sup>a</sup>   |
|                                        |                    | 3                | 9.20±2.52 <sup>a</sup>    | 8.72±2.55 <sup>a</sup>     | 4.74±2.72 <sup>b</sup>  | 4.58±2.36 <sup>cd</sup>  | 5.79±2.93 <sup>bc</sup> | 9.23±3.42 <sup>ab</sup> | 7.32±2.19 <sup>ab</sup> | 7.88±2.19 <sup>bc</sup>  | 7.40±1.96 <sup>abc</sup> |
|                                        |                    | 7                | 9.12±2.63 <sup>a</sup>    | 8.58±2.20 <sup>ab</sup>    | 4.85±2.51 <sup>b</sup>  | 5.34±2.78 <sup>cd</sup>  | 6.06±2.71 <sup>bc</sup> | 6.02±2.22 <sup>cd</sup> | 7.19±3.43 <sup>ab</sup> | 8.97±2.08 <sup>ab</sup>  | 7.82±2.79 <sup>ab</sup>  |
| Sensory evaluation of inner food cubes |                    |                  |                           |                            |                         |                          |                         |                         |                         |                          |                          |
| Inner food                             | Gelling agent      | Storage time (d) | QDA traits                |                            |                         |                          |                         |                         |                         |                          |                          |
|                                        |                    |                  | Whiteness                 | Odor                       | Salty                   | Fishy                    | Flavor                  | Aftertaste              | Hardness                | Moisture                 | Chewiness                |
| Chicken                                | G1C1               | 0                | 7.38±1.94 <sup>ns</sup>   | 8.73±2.43 <sup>a</sup>     | 6.86±1.87 <sup>ab</sup> | 6.38±2.56 <sup>ab</sup>  | 7.68±2.65 <sup>ns</sup> | 5.88±2.35 <sup>ns</sup> | 9.36±2.76 <sup>a</sup>  | 6.95±1.64 <sup>abc</sup> | 6.29±2.12 <sup>ns</sup>  |
|                                        |                    | 3                | 6.90±1.97                 | 6.91±1.87 <sup>ab</sup>    | 4.94±2.68 <sup>b</sup>  | 3.59±2.40 <sup>c</sup>   | 6.26±2.52               | 6.11±2.13               | 7.71±2.04 <sup>ab</sup> | 6.18±2.96 <sup>abc</sup> | 6.89±2.87                |
|                                        |                    | 7                | 5.84±2.56                 | 6.15±2.16 <sup>b</sup>     | 4.47±1.92 <sup>b</sup>  | 4.25±1.82 <sup>bc</sup>  | 6.38±2.28               | 6.17±1.67               | 8.06±0.93 <sup>ab</sup> | 4.80±1.61 <sup>c</sup>   | 5.91±2.38                |
|                                        | G1.5C0.5           | 0                | 7.29±1.86                 | 7.17±1.74 <sup>ab</sup>    | 6.56±1.98 <sup>ab</sup> | 5.55±2.01 <sup>abc</sup> | 7.83±1.75               | 7.31±2.10               | 7.70±1.96 <sup>ab</sup> | 6.69±1.99 <sup>abc</sup> | 7.97±2.67                |
|                                        |                    | 3                | 7.14±1.45                 | 7.04±1.72 <sup>ab</sup>    | 5.57±2.66 <sup>ab</sup> | 4.31±2.61 <sup>bc</sup>  | 6.47±2.19               | 6.50±2.52               | 7.29±2.71 <sup>ab</sup> | 6.51±2.70 <sup>abc</sup> | 6.51±2.12                |
|                                        |                    | 7                | 6.62±2.36                 | 6.65±2.27 <sup>ab</sup>    | 4.94±2.13 <sup>b</sup>  | 4.73±1.78 <sup>bc</sup>  | 7.44±2.14               | 6.74±1.13               | 7.34±1.39 <sup>ab</sup> | 5.73±1.79 <sup>bc</sup>  | 6.11±2.29                |
|                                        | G2C0               | 0                | 7.25±2.63                 | 7.77±1.99 <sup>ab</sup>    | 7.79±2.74 <sup>a</sup>  | 7.41±2.32 <sup>a</sup>   | 8.15±1.80               | 7.32±2.60               | 9.33±1.38 <sup>a</sup>  | 8.39±2.26 <sup>a</sup>   | 6.36±1.73                |
|                                        |                    | 3                | 7.05±1.90                 | 7.32±2.77 <sup>ab</sup>    | 6.41±2.98 <sup>ab</sup> | 5.16±3.18 <sup>abc</sup> | 6.60±3.19               | 6.99±3.19               | 6.74±3.30 <sup>b</sup>  | 7.91±2.83 <sup>ab</sup>  | 6.69±2.14                |
|                                        |                    | 7                | 7.88±2.97                 | 7.52±2.18 <sup>ab</sup>    | 6.05±3.41 <sup>ab</sup> | 5.84±2.43 <sup>abc</sup> | 7.91±2.15               | 7.47±1.63               | 7.38±2.58 <sup>ab</sup> | 6.54±2.21 <sup>abc</sup> | 7.32±1.51                |

All data are represented as mean ± standard deviation (SD).

<sup>1)</sup> G1C1, gelatin 1 % and carrageenan 1 % mixture; G1.5C0.5, gelatin 1.5 % and carrageenan 0.5 % mixture; G2C0, gelatin 2 % (w/w %)

<sup>2)</sup> Different superscripts within column (a-g) or within row (X-Z) indicates significant differences at p < 0.05. ns, not significant within column.
