# Supplementary material for: The Physical, Sensory, and Microbial Qualities of Broth Gels Enclosing Food Cubes and Their Changes during Cold Storage
Source: MDPI journal article supplement (doi:10.3390/pr11082327), 2023-08-02
Supplement: s1 [file s1]

Table S5. QDA results of broth gels and inner food cubes (potatoes)

| Sensory evaluation of broth gel        |                    |                  |                           |                         |                          |                          |                         |                          |                           |                          |                         |
|----------------------------------------|--------------------|------------------|---------------------------|-------------------------|--------------------------|--------------------------|-------------------------|--------------------------|---------------------------|--------------------------|-------------------------|
| Inner food                             | Gelling agent      | Storage time (d) | QDA traits                |                         |                          |                          |                         |                          |                           |                          |                         |
|                                        |                    |                  | Transparent               | Yellowness              | Salty                    | Fishy                    | Aftertaste              | Hardness                 | Moisture                  | Chewiness                | Meltness                |
| Potato                                 | G1C1 <sup>1)</sup> | 0                | 5.03±2.11 <sup>b 2)</sup> | 4.95±1.58 <sup>d</sup>  | 5.00±2.76 <sup>ab</sup>  | 4.85±1.85 <sup>bc</sup>  | 3.89±2.68 <sup>b</sup>  | 10.07±2.25 <sup>a</sup>  | 6.06±2.28 <sup>bcd</sup>  | 5.25±1.99 <sup>de</sup>  | 5.24±1.77 <sup>bc</sup> |
|                                        |                    | 3                | 5.93±2.91 <sup>b</sup>    | 5.70±2.02 <sup>cd</sup> | 3.93±2.93 <sup>b</sup>   | 3.81±2.20 <sup>c</sup>   | 4.31±1.93 <sup>b</sup>  | 10.07±2.59 <sup>a</sup>  | 4.46±2.75 <sup>d</sup>    | 4.92±2.32 <sup>e</sup>   | 3.66±1.46 <sup>c</sup>  |
|                                        |                    | 7                | 4.95±2.09 <sup>b</sup>    | 4.62±1.63 <sup>d</sup>  | 4.46±2.14 <sup>ab</sup>  | 5.07±2.34 <sup>bc</sup>  | 5.39±1.86 <sup>ab</sup> | 9.33±2.27 <sup>ab</sup>  | 5.76±2.50 <sup>cd</sup>   | 5.85±1.59 <sup>de</sup>  | 5.84±2.58 <sup>bc</sup> |
|                                        | G1.5C0.5           | 0                | 6.63±2.03 <sup>b</sup>    | 7.05±2.03 <sup>bc</sup> | 6.02±2.70 <sup>ab</sup>  | 6.12±2.42 <sup>abc</sup> | 4.79±2.94 <sup>b</sup>  | 8.27±1.00 <sup>abc</sup> | 7.43±1.84 <sup>abc</sup>  | 8.10±1.48 <sup>bc</sup>  | 7.35±2.00 <sup>ab</sup> |
|                                        |                    | 3                | 6.92±2.43 <sup>b</sup>    | 7.31±1.68 <sup>bc</sup> | 4.50±2.52 <sup>ab</sup>  | 5.30±2.81 <sup>abc</sup> | 5.18±2.33 <sup>ab</sup> | 9.03±2.24 <sup>ab</sup>  | 5.55±2.09 <sup>cd</sup>   | 6.02±2.42 <sup>cde</sup> | 4.70±1.22 <sup>c</sup>  |
|                                        |                    | 7                | 6.27±1.96 <sup>b</sup>    | 6.30±2.30 <sup>cd</sup> | 4.82±2.61 <sup>ab</sup>  | 6.11±2.33 <sup>abc</sup> | 6.35±2.37 <sup>ab</sup> | 7.71±2.05 <sup>bc</sup>  | 6.72±2.43 <sup>abcd</sup> | 7.40±2.20 <sup>bcd</sup> | 7.26±2.84 <sup>ab</sup> |
|                                        | G2C0               | 0                | 9.39±2.58 <sup>a</sup>    | 9.41±2.04 <sup>a</sup>  | 7.11±2.81 <sup>a</sup>   | 6.87±2.96 <sup>ab</sup>  | 5.40±2.75 <sup>ab</sup> | 6.63±1.94 <sup>c</sup>   | 8.31±2.42 <sup>ab</sup>   | 10.37±1.68 <sup>a</sup>  | 9.17±2.54 <sup>a</sup>  |
|                                        |                    | 3                | 9.74±2.44 <sup>a</sup>    | 8.72±2.52 <sup>ab</sup> | 4.89±2.38 <sup>ab</sup>  | 6.32±2.99 <sup>abc</sup> | 6.29±2.99 <sup>ab</sup> | 8.28±2.85 <sup>abc</sup> | 6.57±2.60 <sup>abcd</sup> | 7.25±2.92 <sup>bcd</sup> | 5.58±2.10 <sup>bc</sup> |
|                                        |                    | 7                | 9.29±2.60 <sup>a</sup>    | 8.49±3.04 <sup>ab</sup> | 5.22±3.30 <sup>ab</sup>  | 7.74±2.29 <sup>a</sup>   | 7.43±2.84 <sup>a</sup>  | 6.42±1.72 <sup>c</sup>   | 8.66±2.81 <sup>a</sup>    | 8.78±3.11 <sup>ab</sup>  | 8.40±3.26 <sup>a</sup>  |
| Sensory evaluation of inner food cubes |                    |                  |                           |                         |                          |                          |                         |                          |                           |                          |                         |
| Inner food                             | Gelling agent      | Storage time (d) | QDA traits                |                         |                          |                          |                         |                          |                           |                          |                         |
|                                        |                    |                  | Whiteness                 | Odor                    | Salty                    | Fishy                    | Flavor                  | Aftertaste               | Hardness                  | Moisture                 | Chewiness               |
| Potato                                 | G1C1               | 0                | 6.06±1.84 <sup>b</sup>    | 6.77±1.27 <sup>ab</sup> | 5.79±2.18 <sup>abc</sup> | 4.83±1.97 <sup>ab</sup>  | 5.19±1.65 <sup>ns</sup> | 5.75±1.82 <sup>ab</sup>  | 9.81±1.92 <sup>a</sup>    | 6.53±3.34 <sup>ns</sup>  | 6.72±2.20 <sup>ns</sup> |
|                                        |                    | 3                | 5.93±2.21 <sup>b</sup>    | 7.24±2.95 <sup>ab</sup> | 3.72±2.18 <sup>c</sup>   | 4.85±2.04 <sup>ab</sup>  | 5.49±2.56               | 6.66±2.90 <sup>ab</sup>  | 7.38±2.92 <sup>bc</sup>   | 6.56±2.57                | 7.04±1.85               |
|                                        |                    | 7                | 5.90±2.52 <sup>b</sup>    | 5.18±2.25 <sup>b</sup>  | 4.46±2.22 <sup>abc</sup> | 3.62±1.92 <sup>b</sup>   | 5.00±2.60               | 4.26±2.08 <sup>b</sup>   | 8.15±2.28 <sup>abc</sup>  | 5.58±2.00                | 6.87±2.62               |
|                                        | G1.5C0.5           | 0                | 7.44±2.35 <sup>ab</sup>   | 7.76±2.09 <sup>a</sup>  | 6.27±2.14 <sup>ab</sup>  | 5.66±1.84 <sup>ab</sup>  | 5.66±2.26               | 6.71±2.20 <sup>ab</sup>  | 9.30±2.33 <sup>ab</sup>   | 6.11±2.83                | 7.34±2.17               |
|                                        |                    | 3                | 6.12±2.16 <sup>b</sup>    | 6.12±2.14 <sup>ab</sup> | 3.96±1.66 <sup>d</sup>   | 5.43±2.48 <sup>ab</sup>  | 5.63±2.49               | 6.44±2.33 <sup>ab</sup>  | 6.56±2.07 <sup>c</sup>    | 7.08±2.60                | 6.74±2.13               |
|                                        |                    | 7                | 7.37±2.47 <sup>ab</sup>   | 6.48±2.23 <sup>ab</sup> | 5.00±2.43 <sup>abc</sup> | 4.37±2.27 <sup>ab</sup>  | 5.84±2.76               | 5.64±2.29 <sup>ab</sup>  | 7.83±1.59 <sup>abc</sup>  | 6.06±1.89                | 7.05±2.18               |
|                                        | G2C0               | 0                | 8.85±2.02 <sup>a</sup>    | 8.49±2.32 <sup>a</sup>  | 6.59±2.41 <sup>a</sup>   | 6.26±2.65 <sup>a</sup>   | 7.14±3.02               | 6.90±2.53 <sup>a</sup>   | 9.68±2.32 <sup>a</sup>    | 6.62±2.25                | 7.11±2.27               |
|                                        |                    | 3                | 6.21±2.56 <sup>b</sup>    | 6.29±2.76 <sup>ab</sup> | 4.13±2.00 <sup>bc</sup>  | 6.14±3.20 <sup>a</sup>   | 5.61±3.05               | 6.48±3.06 <sup>ab</sup>  | 6.57±2.22 <sup>c</sup>    | 7.13±3.25                | 6.48±2.60               |
|                                        |                    | 7                | 8.07±2.72 <sup>ab</sup>   | 6.66±3.07 <sup>ab</sup> | 4.82±2.89 <sup>abc</sup> | 5.57±2.44 <sup>ab</sup>  | 6.06±3.24               | 6.30±2.48 <sup>ab</sup>  | 7.43±2.27 <sup>bc</sup>   | 5.67±2.77                | 6.98±2.02               |

All data are represented as mean ± standard deviation (SD).

<sup>1)</sup> G1C1, gelatin 1 % and carrageenan 1 % mixture; G1.5C0.5, gelatin 1.5 % and carrageenan 0.5 % mixture; G2C0, gelatin 2 % (w/w %)

<sup>2)</sup> Different superscripts within column (a-g) or within row (X-Z) indicates significant differences at p < 0.05. ns, not significant within column.
