# Supplementary material for: The Physical, Sensory, and Microbial Qualities of Broth Gels Enclosing Food Cubes and Their Changes during Cold Storage
Source: MDPI journal article supplement (doi:10.3390/pr11082327), 2023-08-02
Supplement: s1 [file s1]

Table S2. Yellowness of broth gels and inner food cubes

| Yellowness (b*) of outer broth gel  |                    |                             |                            |                            |                            |
|-------------------------------------|--------------------|-----------------------------|----------------------------|----------------------------|----------------------------|
| Inner food                          | Gelling agent      | Storage time (days)         |                            |                            |                            |
|                                     |                    | 0                           | 3                          | 7                          | 14                         |
| S <sup>1)</sup>                     | G1C1 <sup>2)</sup> | -2.15±0.47 <sup>bX 3)</sup> | -3.03±0.01 <sup>bcY</sup>  | -2.66±0.39 <sup>abXY</sup> | -3.04±0.01 <sup>cY</sup>   |
|                                     | G1.5C0.5           | -2.97±0.01 <sup>cdY</sup>   | -3.35±0.56 <sup>bcdY</sup> | -3.48±0.30 <sup>bY</sup>   | 7.02±0.20 <sup>bX</sup>    |
|                                     | G2C0               | -3.10±0.20 <sup>dY</sup>    | -3.27±0.13 <sup>bcdY</sup> | -4.69±0.46 <sup>cZ</sup>   | 11.23±0.61 <sup>aX</sup>   |
| C                                   | G1C1               | -1.45±0.10 <sup>aX</sup>    | -1.99±0.03 <sup>aY</sup>   | -2.70±0.33 <sup>abZ</sup>  | -2.80±0.26 <sup>cZ</sup>   |
|                                     | G1.5C0.5           | -2.59±0.33 <sup>cY</sup>    | -3.46±0.49 <sup>cdY</sup>  | -4.88±0.82 <sup>cZ</sup>   | 6.87±0.17 <sup>bX</sup>    |
|                                     | G2C0               | -1.80±0.37 <sup>abY</sup>   | -3.76±0.47 <sup>deZ</sup>  | -4.51±1.07 <sup>cZ</sup>   | 10.58±0.71 <sup>aX</sup>   |
| P                                   | G1C1               | -1.97±0.09 <sup>bX</sup>    | -2.80±0.25 <sup>bY</sup>   | -2.18±0.28 <sup>aXY</sup>  | -3.69±0.57 <sup>cZ</sup>   |
|                                     | G1.5C0.5           | -2.96±0.01 <sup>cdY</sup>   | -4.18±0.16 <sup>eZ</sup>   | -4.45±0.24 <sup>cZ</sup>   | 6.94±0.20 <sup>bX</sup>    |
|                                     | G2C0               | -3.09±0.10 <sup>dY</sup>    | -3.18±0.05 <sup>bcdY</sup> | -4.74±0.47 <sup>cY</sup>   | 10.74±1.87 <sup>aX</sup>   |
| Yellowness (b*) of inner food cubes |                    |                             |                            |                            |                            |
| Inner food                          | Gelling agent      | Storage time (days)         |                            |                            |                            |
|                                     |                    | 0                           | 3                          | 7                          | 14                         |
| S                                   | G1C1               | 4.12±0.69 <sup>bcXY</sup>   | 5.74±1.14 <sup>cX</sup>    | 2.95±0.81 <sup>cY</sup>    | 4.13±0.76 <sup>cdeXY</sup> |
|                                     | G1.5C0.5           | 3.05±0.27 <sup>cNS</sup>    | 4.15±0.47 <sup>de</sup>    | 3.49±1.78 <sup>c</sup>     | 3.50±0.96 <sup>de</sup>    |
|                                     | G2C0               | 3.75±1.03 <sup>cY</sup>     | 5.01±0.65 <sup>cdXY</sup>  | 6.48±1.17 <sup>bX</sup>    | 5.17±0.29 <sup>cXY</sup>   |
| C                                   | G1C1               | 13.65±0.51 <sup>aY</sup>    | 15.15±0.44 <sup>aX</sup>   | 13.20±1.05 <sup>aY</sup>   | 15.24±0.74 <sup>aX</sup>   |
|                                     | G1.5C0.5           | 12.85±1.34 <sup>aXY</sup>   | 12.77±0.82 <sup>bXY</sup>  | 12.18±1.82 <sup>aY</sup>   | 14.92±0.90 <sup>aX</sup>   |
|                                     | G2C0               | 13.93±1.53 <sup>aNS</sup>   | 12.88±0.54 <sup>b</sup>    | 13.40±1.36 <sup>a</sup>    | 13.42±1.16 <sup>b</sup>    |
| P                                   | G1C1               | 5.43±0.92 <sup>bX</sup>     | 4.58±0.41 <sup>cdeXY</sup> | 3.98±0.64 <sup>cY</sup>    | 4.61±0.22 <sup>cdXY</sup>  |
|                                     | G1.5C0.5           | 3.04±0.60 <sup>cY</sup>     | 1.58±0.33 <sup>fZ</sup>    | 3.24±0.70 <sup>cXY</sup>   | 4.09±0.40 <sup>cdeX</sup>  |
|                                     | G2C0               | 3.21±0.59 <sup>cNS</sup>    | 3.52±0.72 <sup>e</sup>     | 3.95±1.60 <sup>c</sup>     | 3.12±0.77 <sup>e</sup>     |

All data are represented as mean ± standard deviation (SD).

<sup>1)</sup> S, shrimp; C, chicken; P, potato

<sup>2)</sup> G1C1, gelatin 1 % and carrageenan 1 % mixture; G1.5C0.5, gelatin 1.5 % and carrageenan 0.5 % mixture; G2C0, gelatin 2 % (w/w %)

<sup>3)</sup> Different superscripts within column (a-f) or within row (X-Z) indicates significant differences at p < 0.05. NS, not significant within row.
